# Supplementary material
Source: PubMed Central journal article supplement (PMC3021998)
Supplement: supp_124_3_369__1.pdf [file supp_124_3_369__1.pdf]

|              | cancer cell line | tissue       | invasion score | $\beta 1$ integrin subunit [MFI] | $\alpha 3$ integrin subunit [MFI] | $\alpha 4$ integrin subunit [MFI] | $\alpha 5$ integrin subunit [MFI] | $\alpha v \beta 3$ integrin [MFI] | $\alpha v \beta 5$ integrin [MFI] |        |
|--------------|------------------|--------------|----------------|----------------------------------|-----------------------------------|-----------------------------------|-----------------------------------|-----------------------------------|-----------------------------------|--------|
| non-invasive | A172             | brain        | 0.02 ± 0.01    | 324,5                            | 236,3                             | 43,6                              | 63,0                              | 2,1                               | 161,0                             |        |
|              | A427             | lung         | 0 ± 0          | 138,5                            | 128,6                             | 32,3                              | 92,7                              | 24,4                              | 51,2                              |        |
|              | A431             | vulva        | 0 ± 0          | 716,3                            | 858,2                             | 43,8                              | 220,7                             | 3,6                               | 28,2                              |        |
|              | A549             | lung         | 0 ± 0          | 218,4                            | 254,7                             | 53,3                              | 68,2                              | 2,2                               | 131,9                             |        |
|              | BT-20            | breast       | 0 ± 0          | 606,7                            | 1791,2                            | 75,2                              | 77,5                              | 2,1                               | 368,7                             |        |
|              | Caco-2           | colon        | 0 ± 0          | 109,7                            | 8,4                               | 26,3                              | 76,2                              | 2,2                               | 85,6                              |        |
|              | Capan1           | colon        | 0 ± 0          | 2757,1                           | 693,4                             | 114,7                             | 29,0                              | 13,7                              | 61,4                              |        |
|              | Colo201          | colon        | 0.03 ± 0.01    | 483,2                            | 368,0                             | 26,2                              | 72,3                              | 0,9                               | 78,7                              |        |
|              | Colo205          | colon        | 0.05 ± 0.02    | 358,5                            | 147,3                             | 23,1                              | 41,9                              | 0,8                               | 64,9                              |        |
|              | CX1              | colon        | 0 ± 0          | 258,6                            | 227,6                             | 18,9                              | 0,2                               | 2,0                               | 44,7                              |        |
|              | CX-2             | colon        | 0 ± 0          | 137,3                            | 31,2                              | 64,7                              | 28,5                              | 38,3                              | 25,7                              |        |
|              | DLD-1            | colon        | 0.07 ± 0.02    | 634,9                            | 385,5                             | 46,2                              | 90,4                              | 3,6                               | 221,3                             |        |
|              | HCT116           | colon        | 0.01 ± 0.01    | 538,6                            | 979,2                             | 26,1                              | 156,7                             | 2,9                               | 51,5                              |        |
|              | HS578T           | breast       | 0.04 ± 0.01    | 908,9                            | 976,8                             | 30,9                              | 69,0                              | 156,9                             | 93,1                              |        |
|              | HT-29            | colon        | 0 ± 0          | 378,5                            | 366,1                             | 50,3                              | 0,1                               | 3,7                               | 77,3                              |        |
|              | KS               | breast       | 0 ± 0          | 91,1                             | 61,7                              | 26,0                              | 18,2                              | 0,8                               | 72,4                              |        |
|              | LX-1             | lung         | 0 ± 0          | 301,7                            | 80,2                              | 802,5                             | 47,6                              | 10,4                              | 175,1                             |        |
|              | MCF-7            | breast       | 0.08 ± 0.02    | 239,4                            | 269,6                             | 8,3                               | 62,5                              | 1,6                               | 118,0                             |        |
|              | MDA-MB-453       | breast       | 0 ± 0          | 419,3                            | 580,3                             | 119,4                             | 5,3                               | 0,0                               | 149,9                             |        |
|              | MDA-MB-468       | breast       | 0 ± 0          | 268,0                            | 233,7                             | 30,1                              | 13,8                              | 1,4                               | 90,9                              |        |
|              | Mia-Paca-II      | pancreas     | 0.04 ± 0.01    | 345,3                            | 408,0                             | 17,4                              | 49,9                              | 7,1                               | 46,6                              |        |
|              | MS751            | cervix       | 0.02 ± 0.01    | 291,7                            | 711,7                             | 28,0                              | 16,7                              | 1,0                               | 155,5                             |        |
|              | SW48             | colon        | 0 ± 0          | 0,0                              | 0,0                               | 0,0                               | 0,0                               | 0,0                               | 0,0                               |        |
|              | SW480            | colon        | 0.02 ± 0.01    | 401,4                            | 389,5                             | 33,5                              | 119,8                             | 2,0                               | 111,5                             |        |
|              | SW620            | colon        | 0.01 ± 0       | 72,2                             | 18,3                              | 19,1                              | 41,7                              | 3,3                               | 61,7                              |        |
|              | SW948            | colon        | 0 ± 0          | 419,7                            | 84,0                              | 37,2                              | 2,9                               | 1,1                               | 46,9                              |        |
|              | T47D             | breast       | 0 ± 0          | 0,6                              | 0,0                               | 9,8                               | 0,0                               | 0,5                               | 45,6                              |        |
|              |                  |              |                |                                  | 423,0                             | 381,1                             | 66,9                              | 54,3                              | 10,7                              | 97,0   |
|              |                  |              |                | 99,1                             | 78,8                              | 28,8                              | 10,0                              | 5,9                               | 14,4                              | SEM    |
|              |                  |              |                | 0,5132                           | 0,0132                            | 0,7373                            | 0,0005                            | 0,0186                            | 0,7742                            | T-Test |
| invasive     | 1205Lu           | skin         | 0.82 ± 0.20    | 189,6                            | 373,6                             | 24,3                              | 98,6                              | 125,7                             | 76,6                              |        |
|              | 786-0            | kidney       | 0.29 ± 0.04    | 490,8                            | 343,7                             | 112,3                             | 255,4                             | 24,9                              | 103,2                             |        |
|              | A125             | lung         | 3.15 ± 0.29    | 434,3                            | 515,1                             | 28,9                              | 276,0                             | 4,7                               | 108,4                             |        |
|              | A375             | skin         | 0.55 ± 0.09    | 418,8                            | 1091,2                            | 41,5                              | 362,3                             | 9,7                               | 124,6                             |        |
|              | A875             | skin         | 0.35 ± 0.06    | 223,5                            | 433,9                             | 78,5                              | 207,7                             | 19,3                              | 32,3                              |        |
|              | BT549            | breast       | 5.69 ± 0.20    | 336,4                            | 41,1                              | 19,7                              | 280,5                             | 19,7                              | 60,5                              |        |
|              | C33A             | cervix       | 0.53 ± 0.06    | 548,9                            | 1727,6                            | 18,3                              | 72,3                              | 47,0                              | 189,4                             |        |
|              | CAKI-1           | kidney       | 0.11 ± 0.03    | 151,4                            | 36,6                              | 55,8                              | 0,0                               | 17,5                              | 72,8                              |        |
|              | DANG             | pancreas     | 0.86 ± 0.11    | 1416,7                           | 1743,2                            | 58,6                              | 682,2                             | 113,1                             | 47,4                              |        |
|              | DU145            | prostate     | 0.67 ± 0.05    | 188,0                            | 365,4                             | 25,5                              | 55,2                              | 12,0                              | 137,6                             |        |
|              | EJ-28            | bladder      | 3.84 ± 0.42    | 294,6                            | 876,5                             | 20,7                              | 116,7                             | 3,1                               | 16,0                              |        |
|              | FaDu             | hypo pharynx | 0.65 ± 0.13    | 336,8                            | 529,8                             | 662,6                             | 123,3                             | 117,3                             | 93,3                              |        |
|              | Hacat            | skin         | 0.98 ± 0.18    | 1040,0                           | 1181,8                            | 102,4                             | 92,8                              | 2,5                               | 119,2                             |        |
|              | Hela             | cervix       | 1.01 ± 0.10    | 844,5                            | 457,1                             | 79,8                              | 152,5                             | 6,6                               | 58,5                              |        |
|              | MDA-MB-231       | breast       | 2.52 ± 0.12    | 1227,0                           | 2543,0                            | 40,3                              | 344,6                             | 25,2                              | 62,5                              |        |
|              | MDA-MB-361       | breast       | 0.24 ± 0.03    | 291,7                            | 564,9                             | 31,4                              | 67,2                              | 1,0                               | 91,0                              |        |
|              | MDA-MB-435       | breast       | 1.09 ± 0.15    | 261,3                            | 65,0                              | 33,6                              | 53,3                              | 86,6                              | 58,6                              |        |
|              | MDA-MB-436       | breast       | 5.05 ± 0.60    | 321,7                            | 722,5                             | 51,0                              | 180,1                             | 13,3                              | 174,1                             |        |
|              | Me180            | cervix       | 1.38 ± 0.49    | 347,1                            | 817,0                             | 47,2                              | 13,2                              | 17,3                              | 70,8                              |        |
|              | Mew o            | skin         | 3.04 ± 0.32    | 784,2                            | 188,1                             | 271,5                             | 181,3                             | 205,5                             | 74,8                              |        |
|              | PC-3             | prostate     | 6.13 ± 0.66    | 352,1                            | 553,9                             | 39,9                              | 63,3                              | 6,0                               | 77,9                              |        |
|              | RT112            | bladder      | 0.32 ± 0.06    | 425,9                            | 910,0                             | 35,4                              | 199,4                             | 1,2                               | 146,4                             |        |
|              | SKBR3            | breast       | 3.02 ± 0.44    | 663,3                            | 1391,0                            | 34,9                              | 233,3                             | 91,1                              | 141,9                             |        |
| T24          | bladder          | 2.04 ± 0.12  | 466,4          | 847,2                            | 14,4                              | 184,7                             | 17,4                              | 73,0                              |                                   |        |
|              |                  |              |                | 502,3                            | 763,3                             | 80,4                              | 179,0                             | 41,2                              | 92,1                              | mean   |
|              |                  |              |                | 68,2                             | 124,4                             | 27,5                              | 29,9                              | 10,9                              | 8,9                               | SEM    |
