# Supplementary material
Source: PubMed Central journal article supplement (PMC3021998)
Supplement: supp_124_3_369__2.pdf [file supp_124_3_369__2.pdf]

|                                                                                                | % detached beads of<br>$\alpha 5\beta 1^{\text{high}}$ cells | % detached beads of<br>$\alpha 5\beta 1^{\text{low}}$ cells |
|------------------------------------------------------------------------------------------------|--------------------------------------------------------------|-------------------------------------------------------------|
| 100 $\mu\text{g/ml}$ fibronectin-beads<br>control                                              | 9.0                                                          | 19.4                                                        |
| 100 $\mu\text{g/ml}$ fibronectin-beads<br>+ 100 $\mu\text{g/ml}$ soluble fibronectin           | 100                                                          | 100                                                         |
| 5 $\mu\text{g/ml}$ anti $\alpha 5$ ab-beads control                                            | 3.8                                                          | 86.7                                                        |
| 5 $\mu\text{g/ml}$ anti $\alpha 5$ ab-beads<br>+ 10 $\mu\text{g/ml}$ soluble anti $\beta 1$ ab | 100                                                          | 100                                                         |
| 50 $\mu\text{g/ml}$ RGD-beads<br>control                                                       | 0                                                            | 29.8                                                        |
| 50 $\mu\text{g/ml}$ RGD-beads<br>+ 10 $\mu\text{g/ml}$ soluble anti $\beta 1$ ab               | 100                                                          | 100                                                         |
| 100 $\mu\text{g/ml}$ collagen type I-beads<br>control                                          | 3.7                                                          | 2.5                                                         |
| 100 $\mu\text{g/ml}$ collagen type I-beads<br>+ 100 $\mu\text{g/ml}$ soluble collagen          | 100                                                          | 100                                                         |
